# Supplementary material
Source: PubMed Central journal article supplement (PMC6734859)

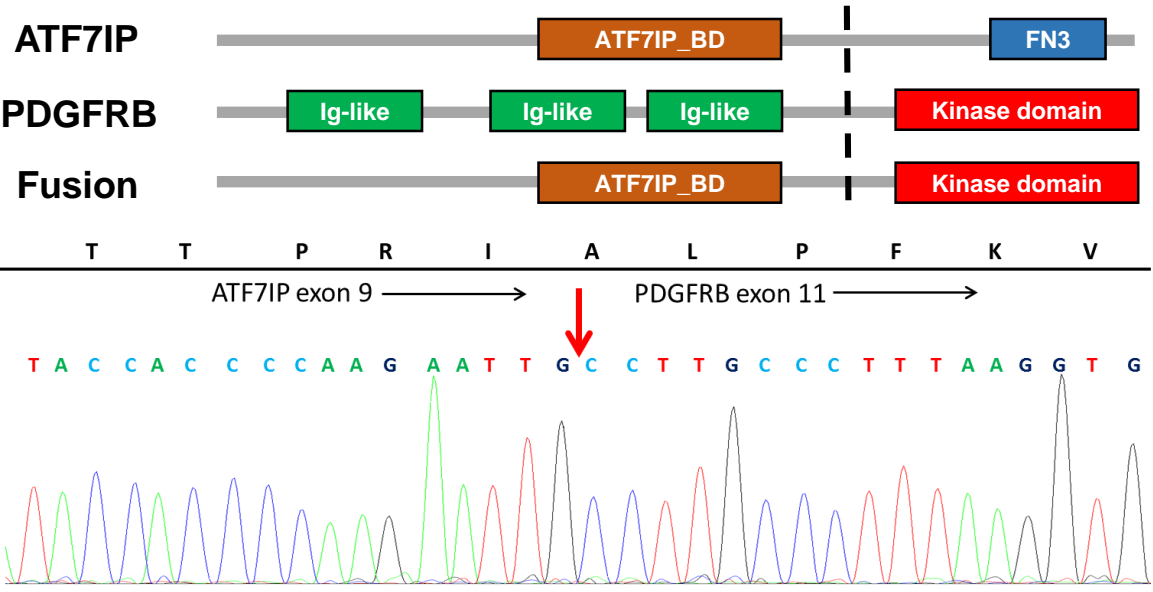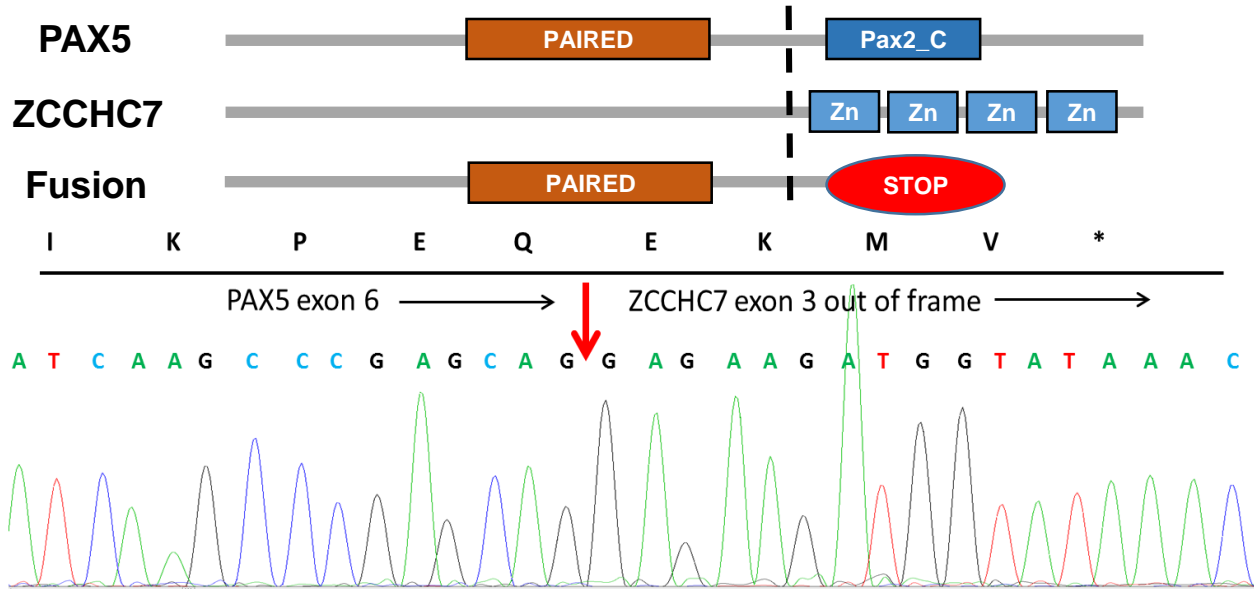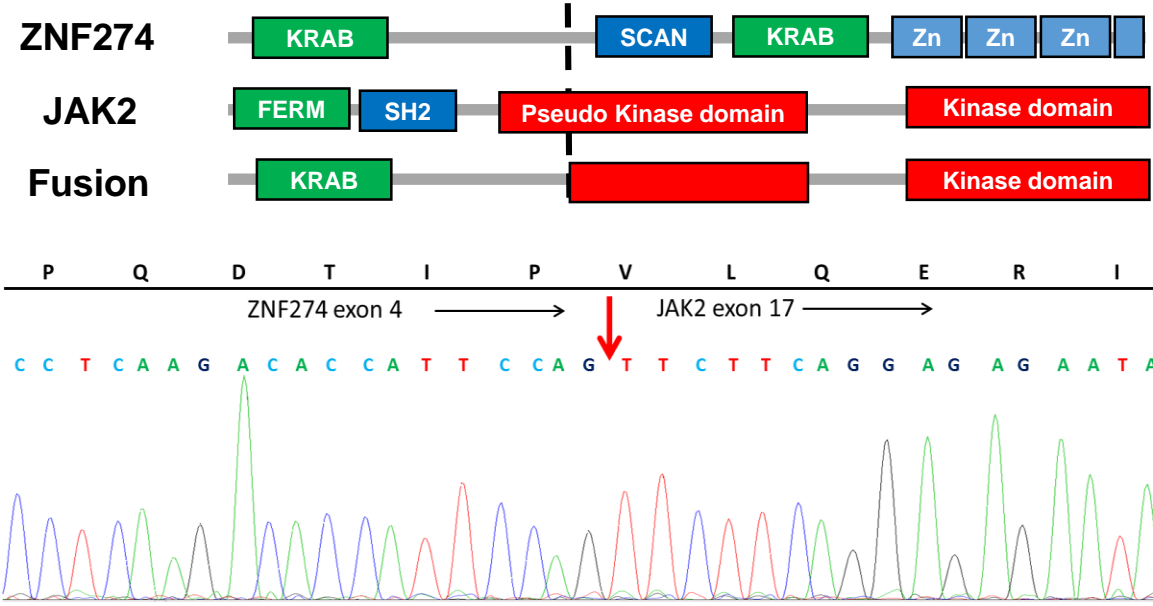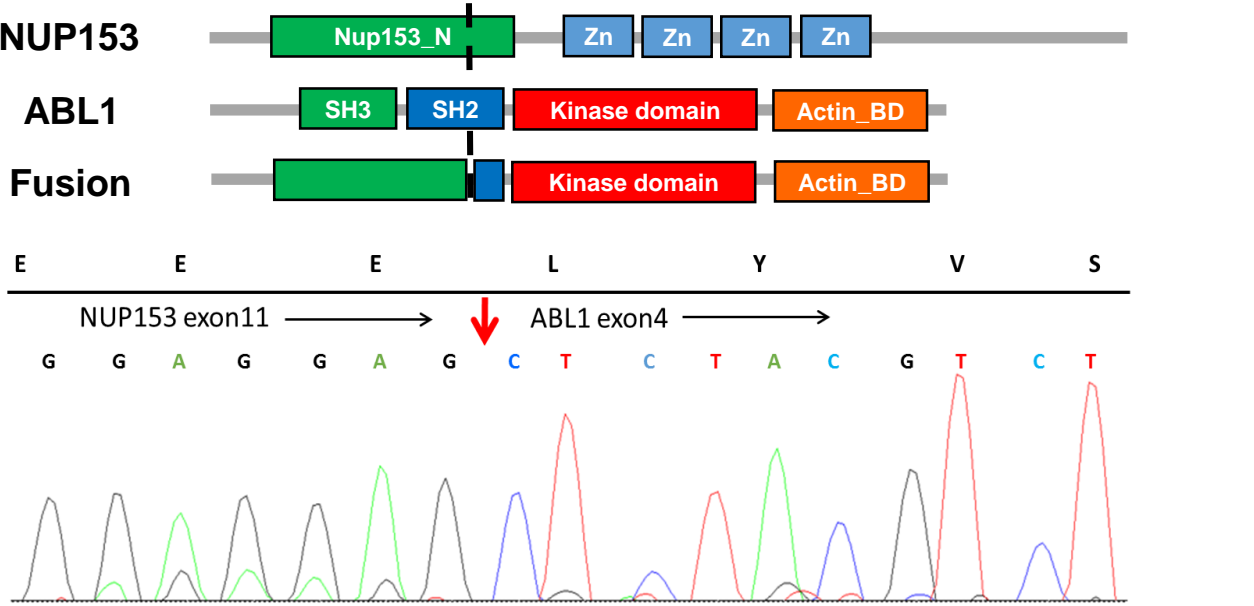

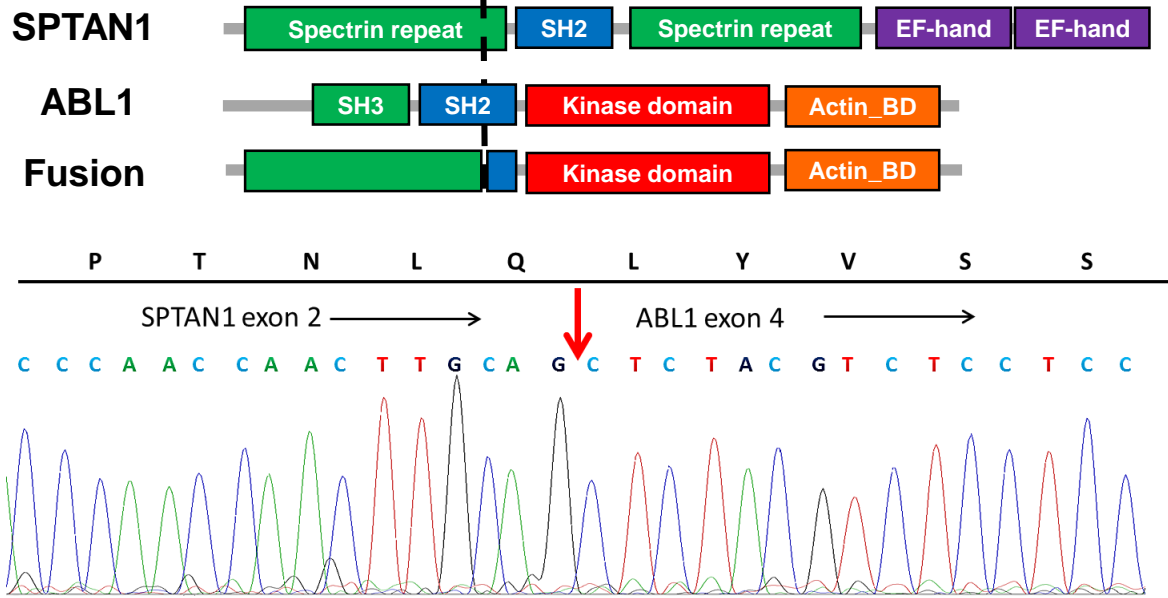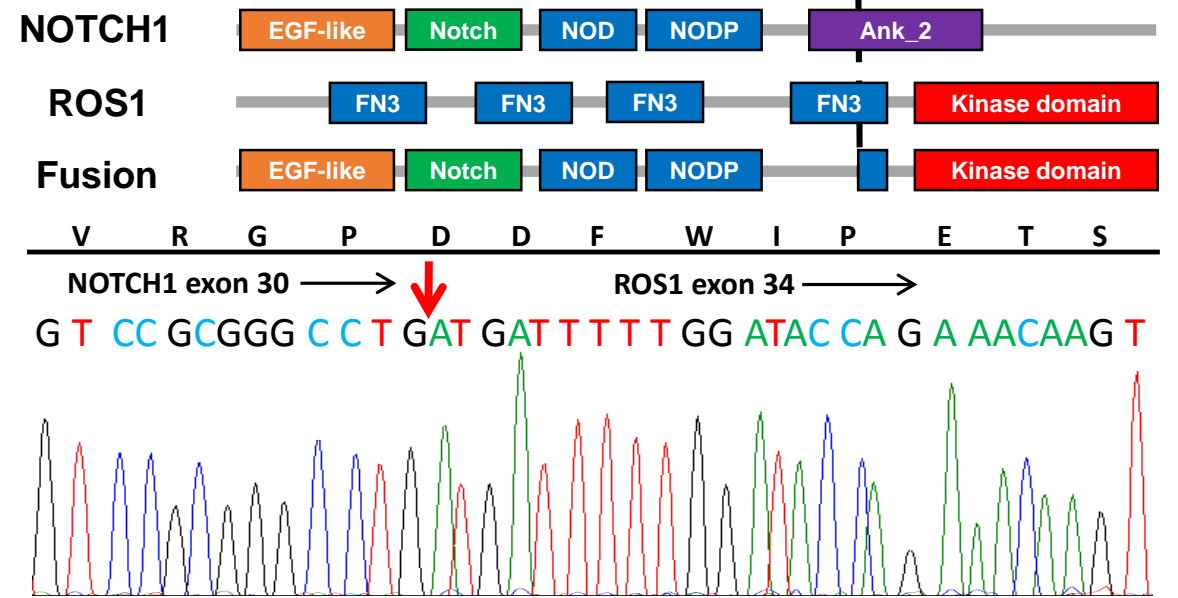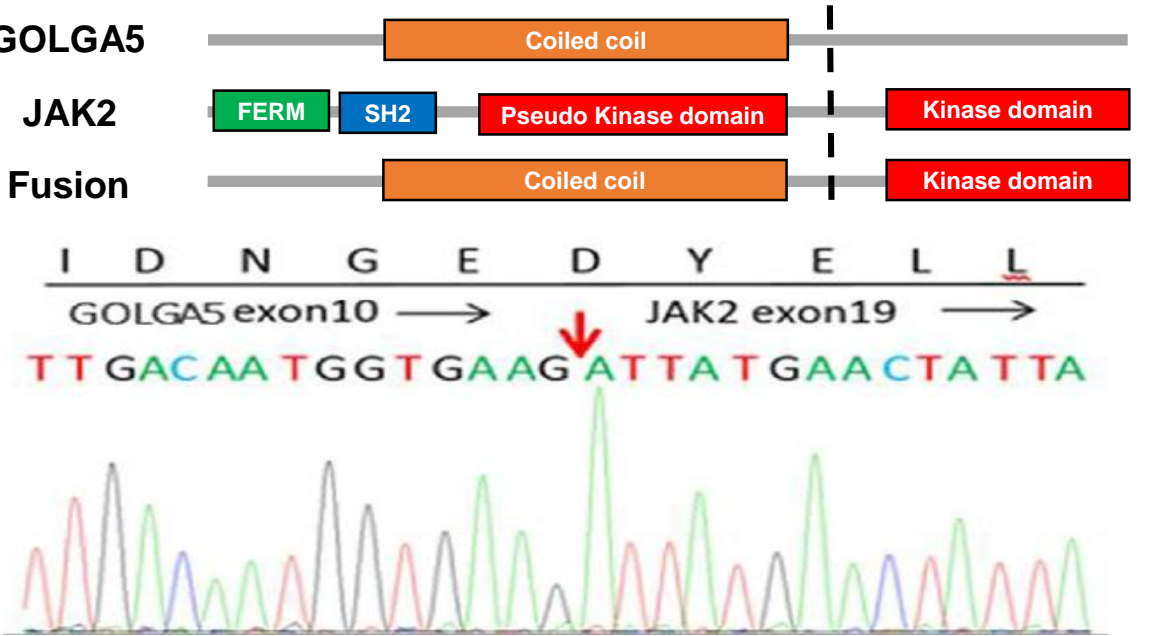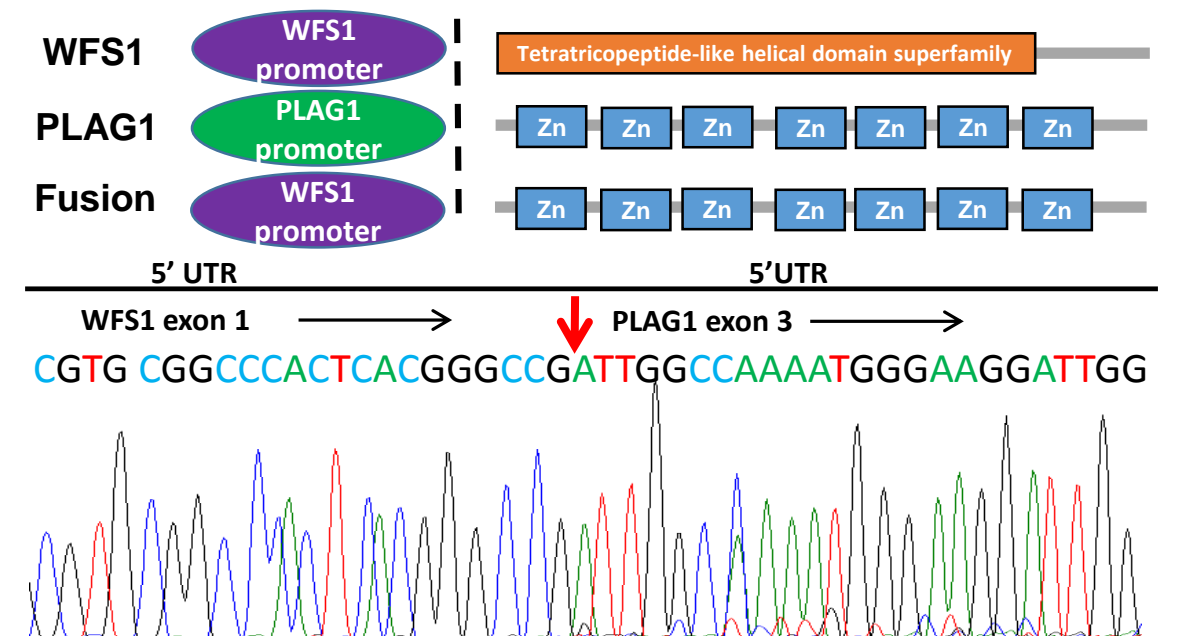

Supplement: mmc1.pdf [file mmc1.pdf]
